# Supplementary material
Source: PubMed Central journal article supplement (PMC7860056)
Supplement: ao0c05545_si_001.pdf [file ao0c05545_si_001.pdf]

**Ethanolamine plasmalogen suppresses apoptosis in human intestinal tract cells *in vitro* by attenuating induced inflammatory stress**

**Ephantus Nguma<sup>1</sup>, Shinji Yamashita<sup>1\*</sup>, Kei Kumagai<sup>2</sup>, Yurika Otoki<sup>2</sup>, Ayaka Yamamoto<sup>3</sup>, Takahiro Eitsuka<sup>2</sup>, Kiyotaka Nakagawa<sup>2</sup>, Teruo Miyazawa<sup>4</sup>, Mikio Kinoshita<sup>1</sup>**

<sup>1</sup>Department of Life and Food Sciences, Obihiro University of Agriculture and Veterinary Medicine, Obihiro, 080-8555, Japan

<sup>2</sup>Food and Biodynamic Chemistry Laboratory, Graduate School of Agricultural Science, Tohoku University, Sendai, 980-8572, Japan

<sup>3</sup>Yaizu Suisankagaku Industry Co., Ltd., Shizuoka, 425-8570, Japan

<sup>4</sup>Food and Biotechnology Platform Promoting Project, New Industry Creation Hatchery Center (NICHe), Tohoku University, Sendai, 980-8579, Japan

**\*Corresponding author:** Shinji Yamashita, Department of Life and Food Sciences, Obihiro University of Agriculture and Veterinary Medicine, West 2-11, Inada, Obihiro, Hokkaido 080-8555, Japan; **Tel:** +81-155-49-5446; **Fax:** +81-155-49-5593; **Email:** [syamashita@obihiro.ac.jp](mailto:syamashita@obihiro.ac.jp)

Supporting information

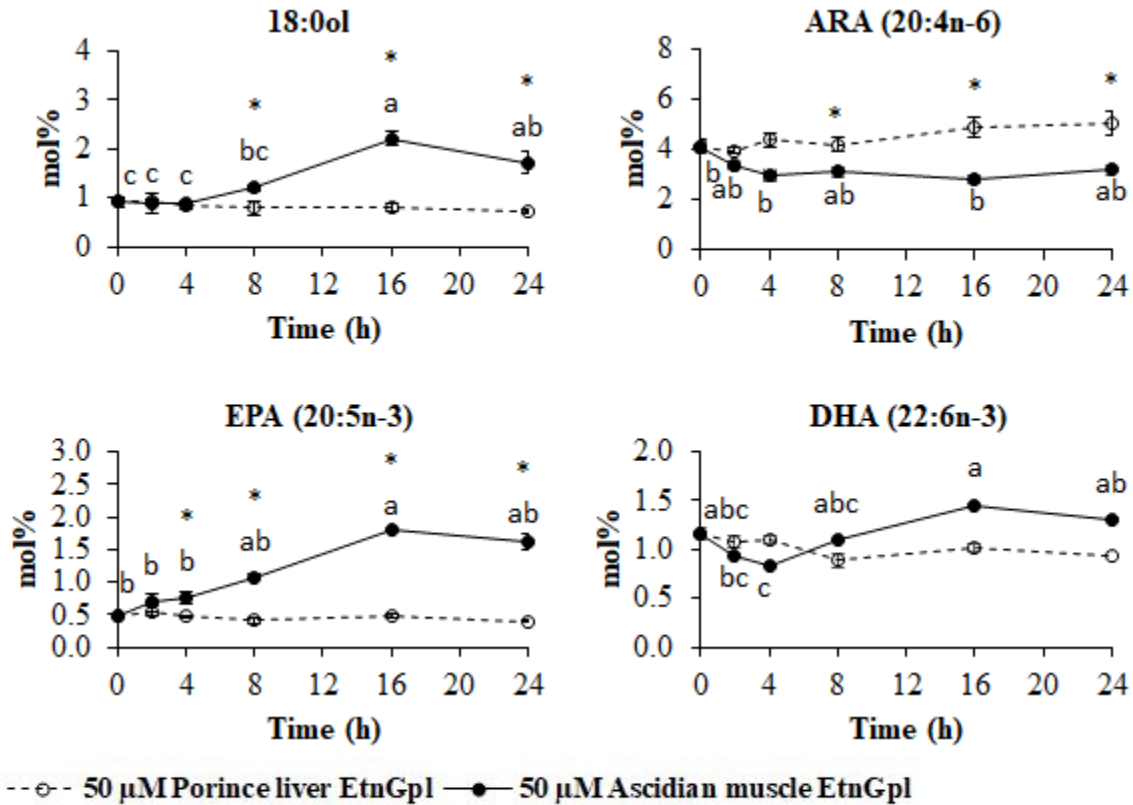

**Figure S1** Time-dependent changes of phospholipid carbon chain composition in differentiated Caco-2 cells after treatment with 50 μM porcine liver and ascidian muscle EtnGpl. Values represent means ± SEM,  $n = 3$ . Different letters indicate significant differences at  $P < 0.05$  among cells treated with the same EtnGpl, determined by ANOVA (Tukey's test). Asterisks indicate significantly higher levels at a given time-point ( $P < 0.05$ , t-test).

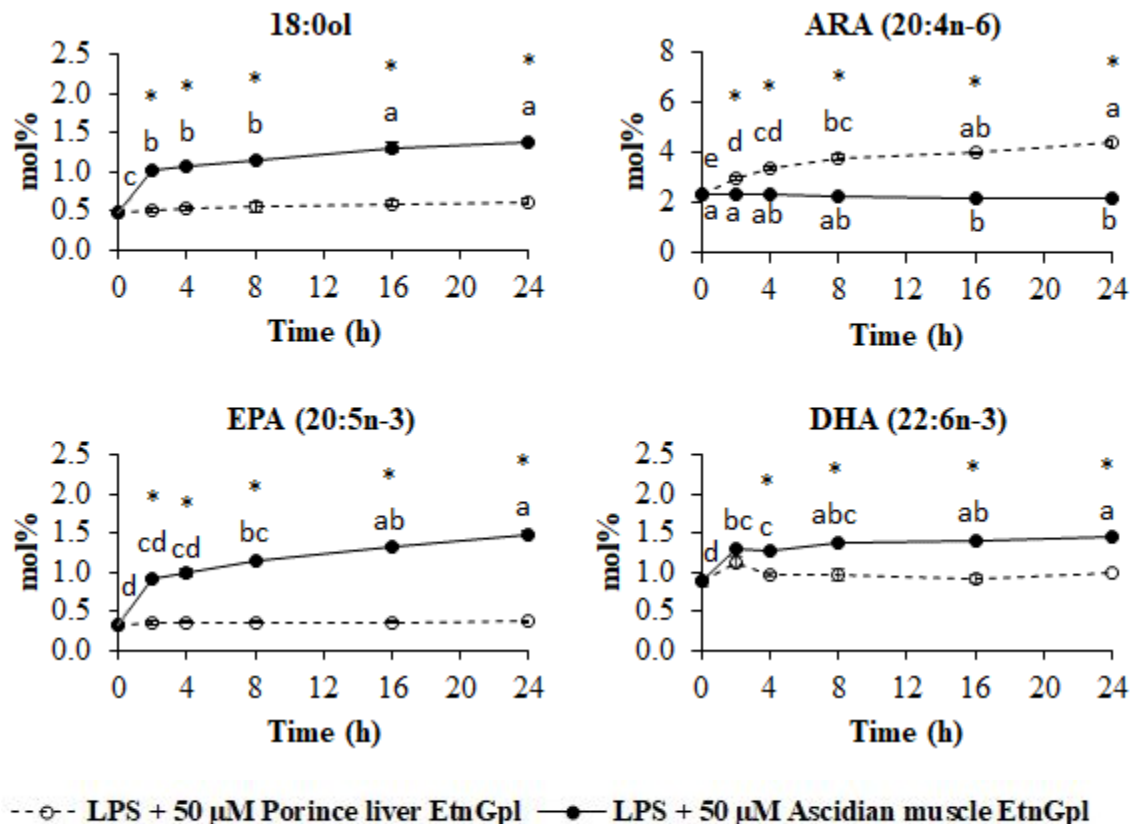

**Figure S2** Time-dependent changes of phospholipid carbon chain composition in differentiated Caco-2 cells after treatment with LPS + 50 μM porcine liver and ascidian muscle EtnGpl. Values represent means ± SEM,  $n = 3$ . Different letters indicate significant differences at  $P < 0.05$  among cells treated with the same EtnGpl, determined by ANOVA (Tukey's test). Asterisks indicate significantly higher levels at a given time-point ( $P < 0.05$ , t-test).
